# Supplementary material for: In Vivo Maturation of Human Induced Pluripotent Stem Cell-Derived Cardiomyocytes in Neonatal and Adult Rat Hearts
Source: PubMed Central journal article supplement — Stem Cell Reports. 2017 Jan 5;8(2):278–89. doi: 10.1016/j.stemcr.2016.10.009 (PMC5311430; doi:10.1016/j.stemcr.2016.10.009), 2017-01-05
Supplement: mmc1.pdf [file mmc1.pdf]

**Stem Cell Reports, Volume 8**

**Supplemental Information**

**In Vivo Maturation of Human Induced Pluripotent Stem Cell-Derived  
Cardiomyocytes in Neonatal and Adult Rat Hearts**

**Shin Kadota, Lil Pabon, Hans Reinecke, and Charles E. Murry**

Figure S1. Related to Figure 1

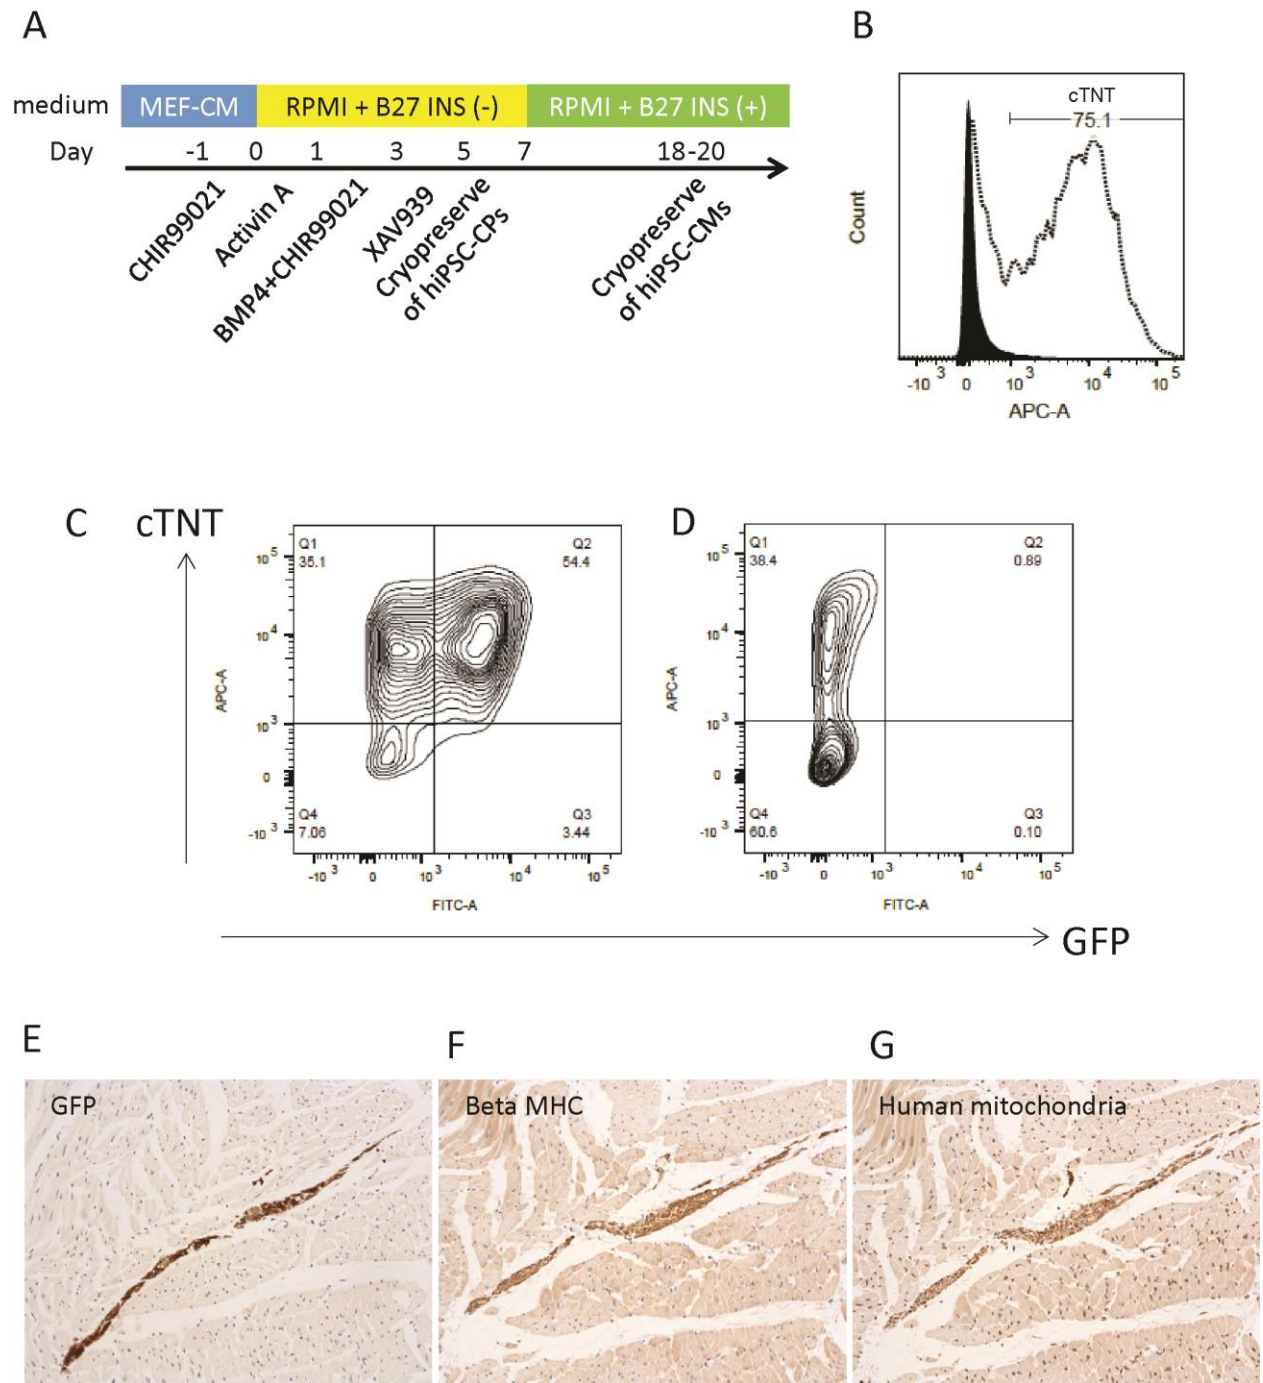

**Figure S2. Related to Figure 2**

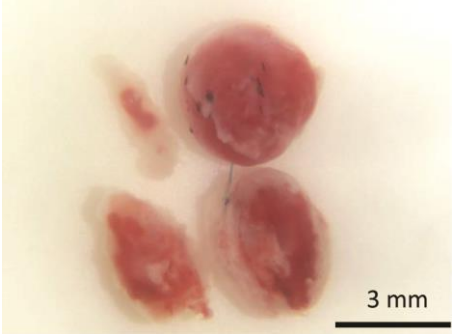

Figure S3. Related to Figure 3

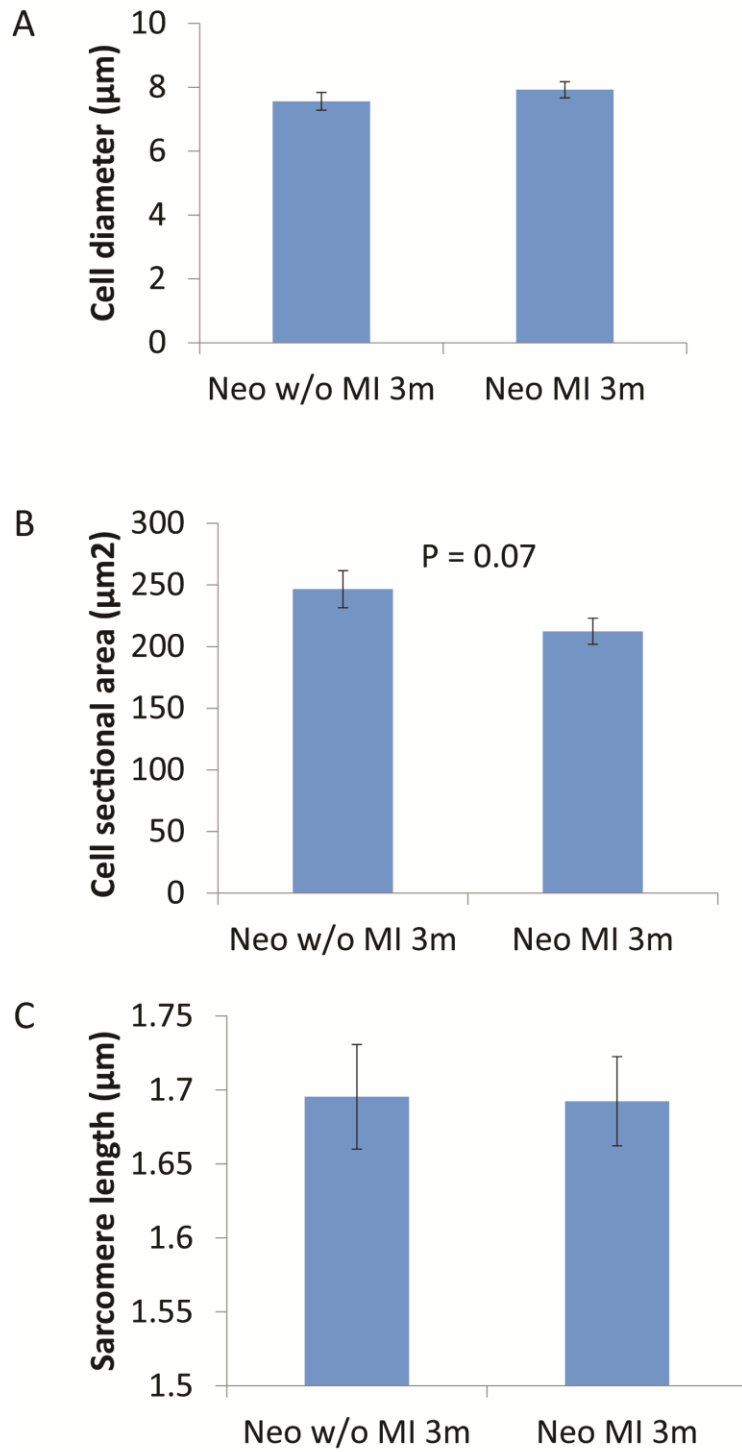

Figure S4. Related to Figure 4

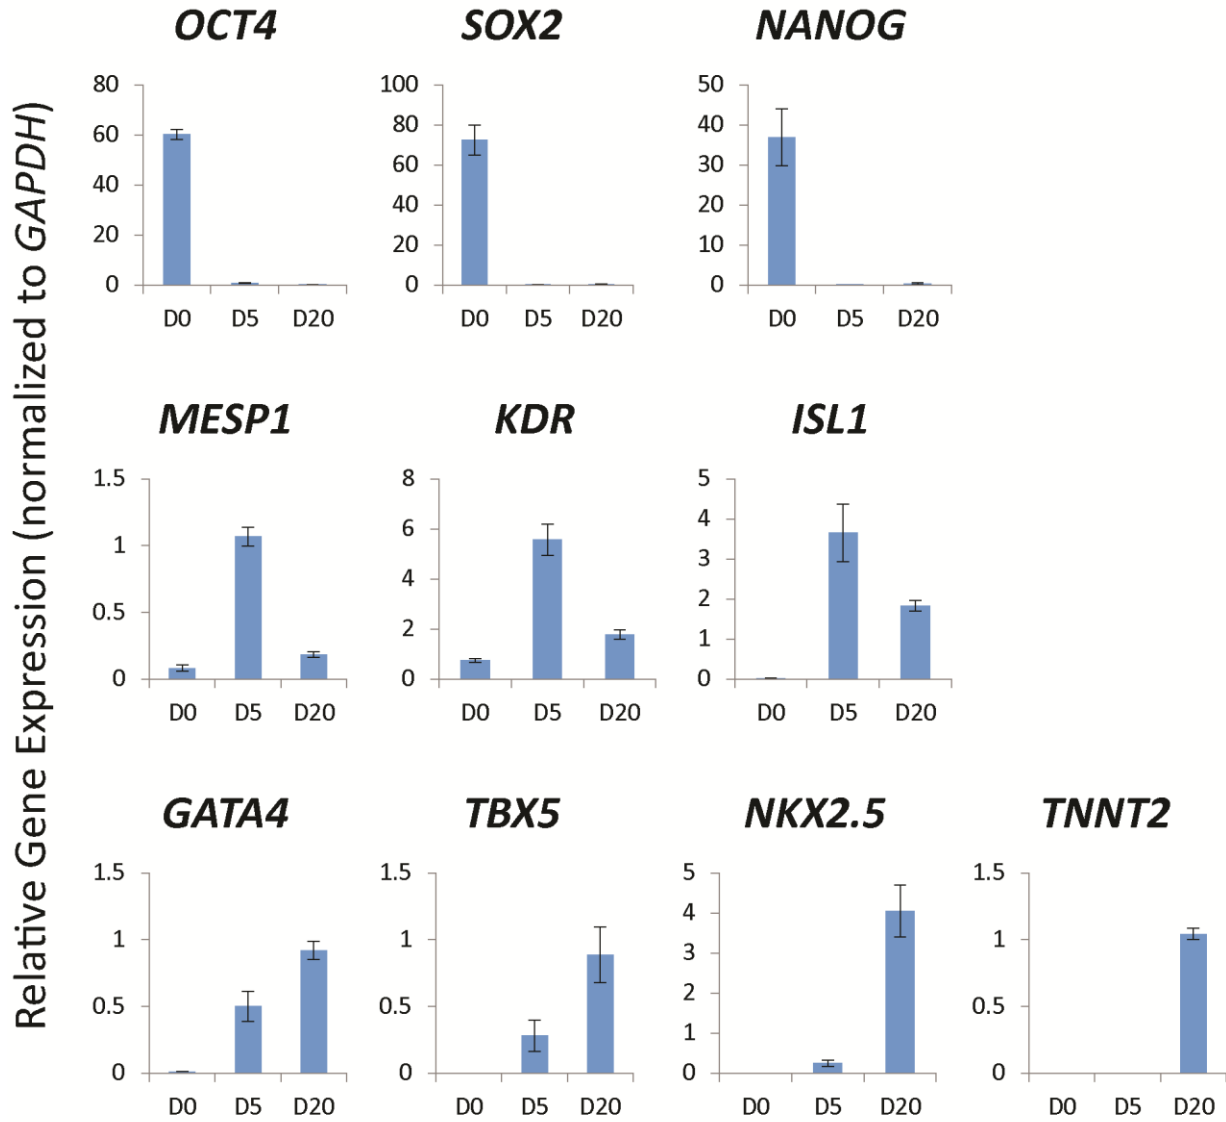

Figure S5. Related to Figure 5

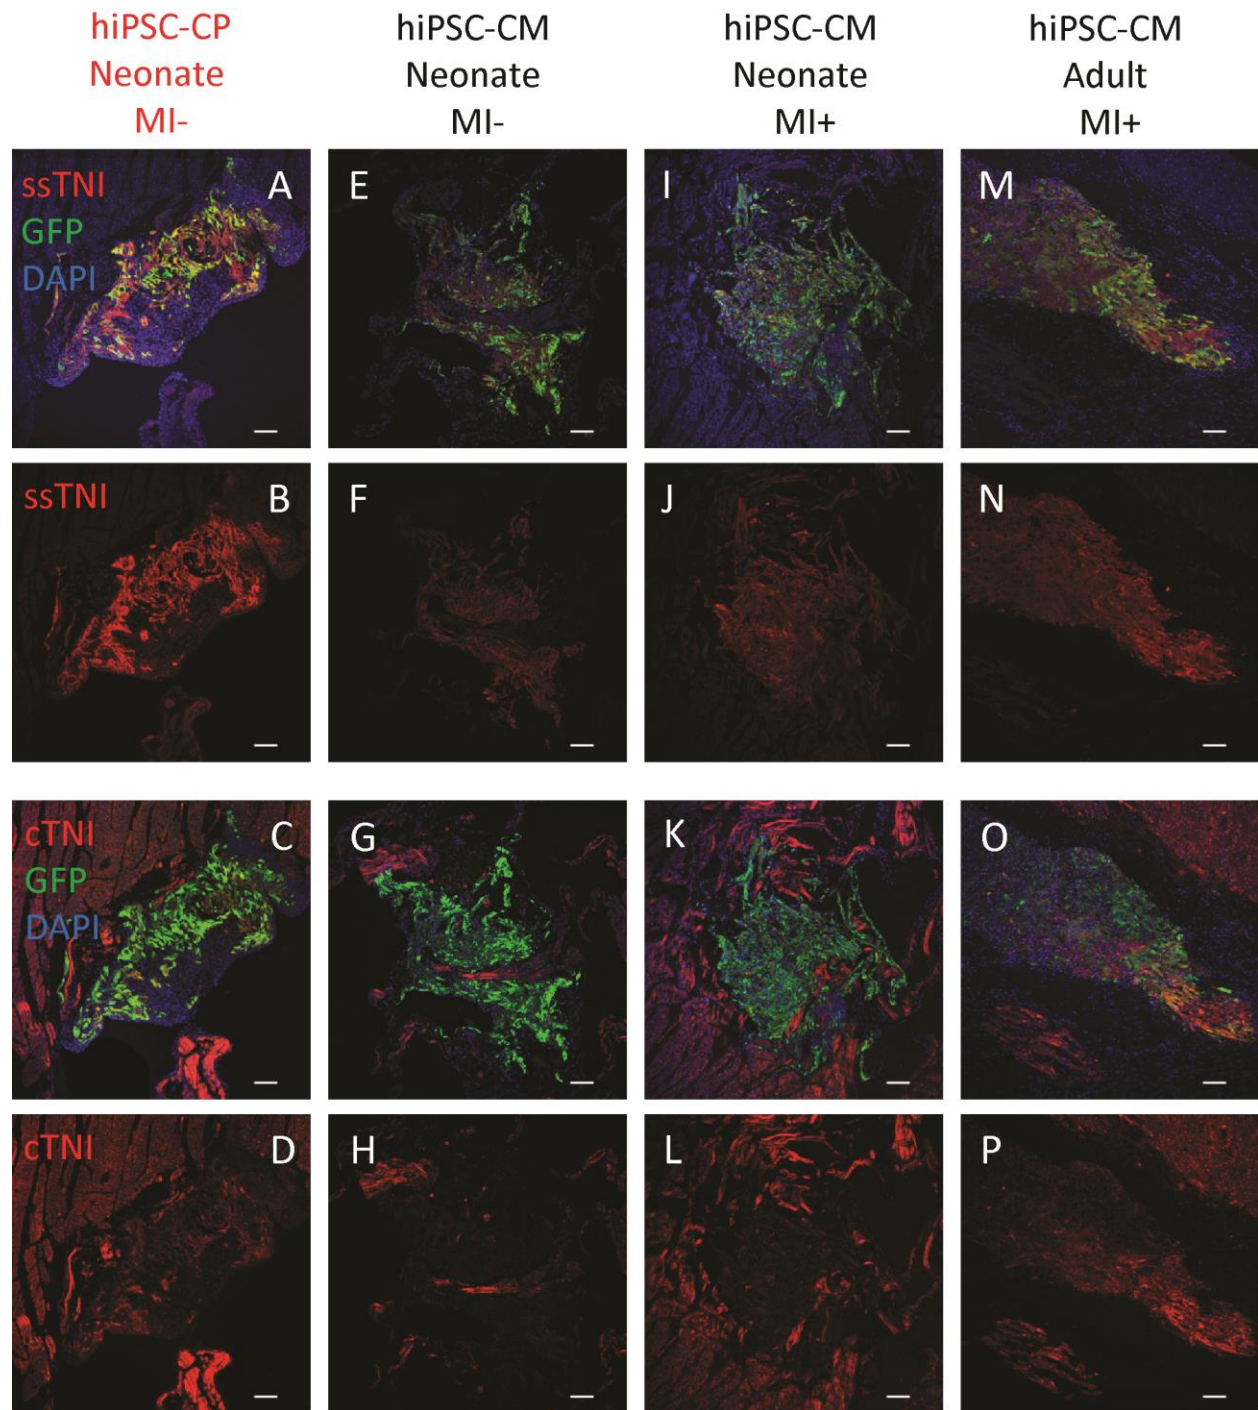

## Supplemental figure legends

### Figure S1. Differentiation protocol, flow cytometry and immunostaining for detection of hiPSC-CMs.

**A:** Scheme of monolayer based direct-differentiation protocol. We harvested and cryopreserved hiPSC-derived cardiac progenitors (hiPSC-CPs) and cardiomyocytes (hiPSC-CMs) at day 5 and 18-20 after differentiation, respectively. MEF-CM = mouse embryonic fibroblast-conditioned medium. INS = insulin. **B:** FACS analysis of day 20 hiPSC-derived cells stained cardiac troponin T (cTNT). Black population is negative control which was stained with isotype antibody. **C-D:** Flow cytometry for differentiated cells at day 20 of 253G1-GCaMP3 which were used in this study (**C**) and wild type 253G1 (**D**) stained cTNT. **E-G:** Serial sections of engrafted hPSC-CMs after 84 days of cell injection to uninjured neonatal rat hearts with GFP (**E**), beta-myosin heavy chain (MHC, **F**) and human mitochondria (**G**) staining.

### Figure S2. TTC staining.

Representative image of TTC staining of injured heart at 3 days after MI of neonatal rat.

### Figure S3. Comparison of hiPSC-CMs in neonatal rat hearts with and without injury.

Comparisons of cell diameter (**A**), cell sectional area (**B**), and sarcomere length (**C**) of engrafted hiPSC-CMs in neonatal rat with and without MI at 3 months after cell injection. N=40 (**A-C**). Data are mean  $\pm$  SEM.

### Figure S4. qRT-PCR.

Horizontal axis shows days after cardiac differentiation. Cardiac mesoderm markers (*MESP1*, *KDR* and *ISL1*) were highly and early cardiac development makers (*GATA4* and *TBX5*) moderately upregulated in day-5 differentiated hiPSC-CPs, although they did neither expressed pluripotent markers (*OCT4*, *SOX2* and *NONOG*), nor cardiac markers (*NKX2.5* and *TNNT2*). N=3 biological replicates. Data are mean  $\pm$  SEM.

### Figure S5. Immunostaining of Troponin I.

Comparison of hiPSC derivatives engrafted in rat hearts after 3 months of cell transplantation with slow skeletal troponin I (ssTNI) and cardiac TnI (cTNI) staining. Representative graft of hiPSC-CP transplantation to neonatal rat without MI (**A-D**), hiPSC-CM transplantation to neonatal rat without MI (**E-H**), neonatal rat with MI (**I-L**), and

adult rat with MI (**M-P**). Scale bar = 100  $\mu$ m.



## Supplemental Tables

**Table S1. Antibodies for immunostaining.**

| Antigen                                          | Antibody type     | Company                              | Catalog number or clone | Concentration | Antigen retrieval |
|--------------------------------------------------|-------------------|--------------------------------------|-------------------------|---------------|-------------------|
| GFP                                              | Rabbit polyclonal | Novus                                | NB600-308               | 1:1000        |                   |
| GFP                                              | Goat polyclonal   | Novus                                | NB100-1770              | 1:1000        |                   |
| Beta-Myosin Heavy Chain                          | Mouse monoclonal  | Developmental Studies Hybridoma Bank | A4.951                  | 1:10          | Citrate HIER      |
| Human mitochondria                               | Mouse monoclonal  | Millipore                            | MAB1273                 | 1:100         | EDTA HIER         |
| Troponin I type 1 (slow skeletal)                | Rabbit polyclonal | Novus                                | NBP1-56641              | 1:200         | Citrate HIER      |
| Cardiac Troponin I                               | Rabbit polyclonal | Abcam                                | ab47003                 | 1:200         | Citrate HIER      |
| Alpha-actinin                                    | Mouse monoclonal  | Sigma-Aldrich                        | A7811                   | 1:500         | Tris-EDTA HIER    |
| Caveolin 3                                       | Rabbit polyclonal | Abcam                                | ab2912                  | 1:500         | Tris-EDTA HIER    |
| N-cadherin                                       | Mouse monoclonal  | Sigma-Aldrich                        | GC-4                    | 1:200         | Citrate HIER      |
| Connexin 43                                      | Rabbit polyclonal | Sigma-Aldrich                        | C6219                   | 1:200         | Citrate HIER      |
| Wheat Germ Agglutinin, Alexa Fluor 594 Conjugate |                   | Thermo Fisher                        | W11262                  | 1:200         |                   |

HIER: Heat-induced epitope retrieval

**Table S2. Primers for qRT-PCR.**

|               | <b>Forward primer</b>    | <b>Reverse primer</b>      |
|---------------|--------------------------|----------------------------|
| <i>OCT4</i>   | GGGTTCTATTTGGGAAGGTAT    | TTCATTGTTGTCAGCTTCCT       |
| <i>SOX2</i>   | GCCGAGTGGAAACTTTTGTCTG   | GGCAGCGTGTACTTATCCTTCT     |
| <i>NANOG</i>  | TTTGTGGGCCTGAAGAAAAC     | AGGGCTGTCCTGAATAAGCAG      |
| <i>ISL1</i>   | ATTTCCCTATGTGTTGGTTGC    | CGTTCTTGCTGAAGCCGATG       |
| <i>KDR</i>    | GCACAAAGTGACACGTTGAGAT   | AGTGATCGGAAATGACACTGGA     |
| <i>MESP1</i>  | TCGAAGTGGTTCCTTGGCAGAC   | CCTCTGCTTGCCTCAAAGTGTC     |
| <i>GATA4</i>  | ACACCCCAATCTCGATATGTTTG  | GTTGCACAGATAGTGACCCGT      |
| <i>TBX5</i>   | GAACCACAAGATCACGCAATTA   | ACACCATTCTCACACTGGTAT      |
| <i>NKX2.5</i> | ACCCTGAGTCCCCTGGATTT     | TCACTCATTGCACGCTGCAT       |
| <i>TNNT2</i>  | TTCACCAAAGATCTGCTCCTCGCT | TTATTACTGGTGTGGAGTGGGTGTGG |
| <i>GAPDH</i>  | ATGGAAATCCCATCACCATCTT   | CGCCCCACTTGATTTTGG         |
